# Supplementary material for: Methionine restriction breaks obligatory coupling of cell proliferation and death by an oncogene Src in Drosophila
Source: eLife. 2021 Apr 27;10:e59809. doi: 10.7554/eLife.59809 (PMC8079150; doi:10.7554/eLife.59809)
Supplement: Supplementary file 1. — The table shows stock IDs and results of survivor numbers and the wing phenotype. [file elife-59809-supp1.xlsx]

## Sheet: Sheet1
	Stock center	Stock number used in 1st screening	Number of survivors	Wing phenotype
	Bloomington Drosophila Stock Center	25791	1	Disheveled wings
		25963	0	-
		27514	0	-
		27682	0	-
		28587	0	-
		28602	1	Disheveled wings
		28978	0	-
		29409	5	Disheveled wings
		29455	1	Disheveled wings
		29463	3	Disheveled wings
		31038	1	Disheveled wings
		31263	1	Disheveled wings
		31596	3	Disheveled wings
		32464	0	-
		32932	1	Disheveled wings
		32948	5	Recovered
		32992	0	-
		33383	0	-
		33404	0	-
		34813	0	-
		35159	4	Disheveled wings
		35180	1	Disheveled wings
		35369	0	-
		35614	3	Disheveled wings
		35701	1	Disheveled wings
		36761	4	Disheveled wings
		36762	0	-
		36763	1	Disheveled wings
		36764	2	Disheveled wings
		36765	1	Disheveled wings
		38933	0	-
		39025	0	-
		41939	0	-
		51483	0	-
		53882	1	Disheveled wings
		53985	0	-
		55178	0	-
		55276	0	-
		55679	2	Disheveled wings
		55863	1	Disheveled wings
		55899	0	-
		55903	1	Disheveled wings
		57296	3	Disheveled wings
		60038	0	-
		63723	1	Disheveled wings
		77432	0	-
	Vienna Drosophila Resource Center	v100333	3	Disheveled wings
		v101294	0	-
		v101357	5	Disheveled wings
		v101414	0	-
		v101636	0	-
		v101834	0	-
		v102533	0	-
		v103410	1	Disheveled wings
		v104538	0	-
		v104701	0	-
		v105351	0	-
		v105824	0	-
		v106449	0	-
		v106962	0	-
		v107071	0	-
		v107766	0	-
		v107844	1	Disheveled wings
		v108181	1	Disheveled wings
		v108199	0	-
		v108271	1	Disheveled wings
		v109615	0	-
		v109651	0	-
		v110339	0	-
		v110671	0	-
		v110765	0	-
		v14360	0	-
		v15340	3	Disheveled wings
		v17740	4	Disheveled wings
		v21436	0	-
		v21437	0	-
		v22675	0	-
		v23664	0	-
		v23665	0	-
		v2544	0	-
		v25529	0	-
		v2972	0	-
		v2973	0	-
		v30186	0	-
		v30187	0	-
		v30189	0	-
		v30190	0	-
		v31012	0	-
		v330155	0	-
		v34898	0	-
		v35261	0	-
		v35262	1	Disheveled wings
		v43454	0	-
		v44155	0	-
		v44156	0	-
		v45176	0	-
		v45177	0	-
		v45252	0	-
		v45341	0	-
		v45939	0	-
		v46241	0	-
		v51968	1	Disheveled wings
		v5532	0	-
		v7926	0	-
		v848	7	Disheveled wings
		v849	0	-
		v9253	0	-
