# Supplementary material for: Methionine restriction breaks obligatory coupling of cell proliferation and death by an oncogene Src in Drosophila
Source: eLife. 2021 Apr 27;10:e59809. doi: 10.7554/eLife.59809 (PMC8079150; doi:10.7554/eLife.59809)
Supplement: Supplementary file 2. — The table shows components of the fly foods that were used for dietary restriction, amino acid subtraction, and methionine addition experiments. [file elife-59809-supp2.xlsx]

## Sheet: Sheet1
		Yeast	Sucrose	Agar	I	L	K	R	M	H	T	F	V	W	G	A	C	S	Y	D	N	Q	E	P	Propionic acid	Butylparaben
		g/100ml																							ml/100ml
	1x	10	5	1.5																					0.3	0.3
	1/2x	5	5	1.5																					0.3	0.3
	1/4x	2.5	5	1.5																					0.3	0.3
	1/8x	1.25	5	1.5																					0.3	0.3
	1/8x + 1xMet	1.25	5	1.5					0.08																0.3	0.3
	1/8x + 2xMet	1.25	5	1.5					0.16																0.3	0.3
	1/8x + 4xMet	1.25	5	1.5					0.32																0.3	0.3
	1/8x + 8xMet	1.25	5	1.5					0.64																0.3	0.3
	1/8x + All 1x	1.25	5	1.5	0.0182	0.0121	0.152072	0.1	0.08	0.1	0.2	0.13	0.28	0.05	0.32	0.35	0.005	0.19	0.0042	0.17	0.17	0.25	0.87	0.15	0.3	0.3
	1/8x + All EAA 1x	1.25	5	1.5	0.0182	0.0121	0.152072	0.1	0.08	0.1	0.2	0.13	0.28	0.05											0.3	0.3
	1/8x + All NEAA 1x	1.25	5	1.5											0.32	0.35	0.005	0.19	0.0042	0.17	0.17	0.25	0.87	0.15	0.3	0.3
	1/8x + All EAA 1 - I	1.25	5	1.5		0.0121	0.152072	0.1	0.08	0.1	0.2	0.13	0.28	0.05											0.3	0.3
	1/8x + All EAA 1 - L	1.25	5	1.5	0.0182		0.152072	0.1	0.08	0.1	0.2	0.13	0.28	0.05											0.3	0.3
	1/8x + All EAA 1 - K	1.25	5	1.5	0.0182	0.0121		0.1	0.08	0.1	0.2	0.13	0.28	0.05											0.3	0.3
	1/8x + All EAA 1 - R	1.25	5	1.5	0.0182	0.0121	0.152072		0.08	0.1	0.2	0.13	0.28	0.05											0.3	0.3
	1/8x + All EAA 1 - M	1.25	5	1.5	0.0182	0.0121	0.152072	0.1		0.1	0.2	0.13	0.28	0.05											0.3	0.3
	1/8x + All EAA 1 - H	1.25	5	1.5	0.0182	0.0121	0.152072	0.1	0.08		0.2	0.13	0.28	0.05											0.3	0.3
	1/8x + All EAA 1 - T	1.25	5	1.5	0.0182	0.0121	0.152072	0.1	0.08	0.1		0.13	0.28	0.05											0.3	0.3
	1/8x + All EAA 1 - F	1.25	5	1.5	0.0182	0.0121	0.152072	0.1	0.08	0.1	0.2		0.28	0.05											0.3	0.3
	1/8x + All EAA 1 - V	1.25	5	1.5	0.0182	0.0121	0.152072	0.1	0.08	0.1	0.2	0.13		0.05											0.3	0.3
	1/8x + All EAA 1 - W	1.25	5	1.5	0.0182	0.0121	0.152072	0.1	0.08	0.1	0.2	0.13	0.28												0.3	0.3
