# Supplementary material for: Methionine restriction breaks obligatory coupling of cell proliferation and death by an oncogene Src in Drosophila
Source: eLife. 2021 Apr 27;10:e59809. doi: 10.7554/eLife.59809 (PMC8079150; doi:10.7554/eLife.59809)
Supplement: Supplementary file 3. — The table shows all the plotted data and information of statistic analyses performed in this manuscript. [file elife-59809-supp3.xlsx]

## Sheet: Figure 1 B
		Density of pH3+ cells in GFP+ cells (relative)			Unpaired t test
	Sample number	vg>+	vg>Src42A CA		P value	0.0002
	1	1.15247	1.43862		P value summary	***
	2	1.13452	1.46597		Significantly different (P < 0.05)?	Yes
	3	0.987337	1.12784		One- or two-tailed P value?	Two-tailed
	4	0.946358	1.03173		t, df	t=4.251, df=26
	5	0.905405	1.21786
	6	1.01934	1.2548		Data analyzed
	7	0.944986	1.2403		Sample size, vg>+	13
	8	0.95909	0.948714		Sample size, vg>Src42A CA	15
	9	0.948822	1.23198
	10	0.910089	1.00832
	11	1.14397	1.13853
	12	0.883188	1.24986
	13	1.06442	1.24536
	14		1.17865
	15		1.16066
	Average	1	1.19595

## Sheet: Figure 1 D
		% of DCP1+ cells in GFP+ cells (%)			Unpaired t test
	Sample number	vg>+	vg>Src42A CA		P value	<0.0001
	1	0.263633	36.4865		P value summary	****
	2	0.297426	36.518		Significantly different (P < 0.05)?	Yes
	3	0.02669	45.3847		One- or two-tailed P value?	Two-tailed
	4	0.044842	44.5061		t, df	t=24.97, df=10
	5	1.00446	43.5201
	6	0.350308	40.0198		Data analyzed
	Average	0.331227	41.0725		Sample size, vg>+	6
					Sample size, vg>Src42A CA	6

## Sheet: Figure 1 E
		Volume of GFP+ cells (um3)			Unpaired t test
	Sample number	vg>+	vg>Src42A CA		P value	0.0006
	1	823671	805890		P value summary	***
	2	916074	1020000		Significantly different (P < 0.05)?	Yes
	3	843628	635401		One- or two-tailed P value?	Two-tailed
	4	697783	1280000		t, df	t=3.891, df=26
	5	708625	1480000
	6	879718	1230000		Data analyzed
	7	805998	1130000		Sample size, vg>+	13
	8	958451	858199		Sample size, vg>src42A CA	15
	9	692017	1590000
	10	676119	1430000
	11	852750	1060000
	12	934615	1410000
	13	712034	985181
	14		1160000
	15		821091
	Average	807806	1.12638e+06

## Sheet: Figure 2 A
		Survival rate (%)				Šídák's multiple comparisons test	Mean Diff.	95.00% CI of diff.	Below threshold?	Summary	Adjusted P Value
	Sample number	vg>+	vg>Src42A CA	vg>Src42A CA, slpr RNAi		vg>+ vs. vg>src42A CA	82.29	70.96 to 93.61	Yes	****	<0.0001
	1	92	12	60		vg>src42A CA vs. vg>src42A CA slpr RNAi	-49.43	-60.76 to -38.10	Yes	****	<0.0001
	2	100	0	84
	3	94	20	68		Test details	Mean 1	Mean 2	Mean Diff.	SE of diff.	n1	n2	t	DF
	4	96	8	60		vg>+ vs. vg>src42A CA	92.29	10	82.29	4.667	7	8	17.63	19
	5	86	12	44		vg>src42A CA vs. vg>src42A CA slpr RNAi	10	59.43	-49.43	4.667	8	7	10.59	19
	6	84	12	48
	7	94	12	52		Data analyzed
	8		4			Sample size, vg>+	7
	Average	92.2857	10	59.4286		Sample size, vg>Src42A CA	8
						Sample size, vg>Src42A CA, slpr RNAi	7

## Sheet: Figure 2 D
		Mean intensity of TRE-RFP in GFP+ cells (relative)				Šídák's multiple comparisons test	Mean Diff.	95.00% CI of diff.	Below threshold?	Summary	Adjusted P Value
	Sample number	vg>+	vg>Src42A CA	vg>Src42A CA, slpr RNAi		vg>+ vs. vg>src42A CA	-73.23	-80.51 to -65.95	Yes	****	<0.0001
	1	0.857275	73.9195	30.9672		vg>+ vs. vg>src42A CA, slpr RNAi	-34.08	-41.36 to -26.80	Yes	****	<0.0001
	2	0.892365	64.925	33.3606		vg>src42A CA vs. vg>src42A CA, slpr RNAi	39.15	31.60 to 46.70	Yes	****	<0.0001
	3	0.931256	76.0534	26.2202
	4	1.35532	68.599	38.6605		Test details	Mean 1	Mean 2	Mean Diff.	SE of diff.	n1	n2	t	DF
	5	0.940416	80.9382	41.3701		vg>+ vs. vg>src42A CA	1	74.23	-73.23	2.731	7	6	26.81	16
	6	0.890886	80.9298	39.8863		vg>+ vs. vg>src42A CA, slpr RNAi	1	35.08	-34.08	2.731	7	6	12.48	16
	7	1.13248				vg>src42A CA vs. vg>src42A CA, slpr RNAi	74.23	35.08	39.15	2.834	6	6	13.81	16
	Average	1	74.2275	35.0775
						Data analyzed
						Sample size, vg>+	7
						Sample size, vg>Src42A CA	6
						Sample size, vg>Src42A CA, slpr RNAi	6

## Sheet: Figure 2 S1 A
	Shown in table 1

## Sheet: Figure 2 S1 B
		Survival rate (%)																		Dunnett's multiple comparisons test	Mean Diff.	95.00% CI of diff.	Below threshold?	Summary	Adjusted P Value	A-?
	Sample number	vg>Src42A CA	vg>Src42A CA, tak1 101357KK	vg>Src42A CA, tak1 BL57396	vg>Src42A CA, slpr RNAi	vg>Src42A CA, CYLD 15340GD	vg>Src42A CA, CYLD BL35614	vg>Src42A CA, raf BL31596	vg>Src42A CA, raf BL55679	vg>Src42A CA, bwa BL29409	vg>Src42A CA, cdase BL36764	vg>Src42A CA, PGRP-LC 106361KK	vg>Src42A CA, FADD 100333KK	vg>Src42A CA, CG15533 BL36761	vg>Src42A CA, put BL35159	vg>Src42A CA, put 848GD	vg>Src42A CA, calpain D 17740GD	vg>Src42A CA,calpain D BL29463		vg>Src42A CA vs. tak1 101357KK	0.4	-3.422 to 4.222	No	ns	0.9996	B	tak1 101357KK
	1	0	0	0	12	0	0	0.12	0	4	0	0	0	0	4	0	8	0		vg>Src42A CA vs. tak1 BL57296	0	-3.822 to 3.822	No	ns	>0.9999	C	tak1 BL57296
	2	4	0	4	32	0	0	0.04	12	0	4	0	0	0	0	0	4	0		vg>Src42A CA vs. slpr RNAi BL32948	-20.4	-25.08 to -15.72	Yes	****	<0.0001	D	slpr RNAi BL32948
	3	0	0	0	20	0	0	0.04	0	8	4	0	0	0	0	0	0	0		vg>Src42A CA vs. CYLD 15340GD	0.4	-4.013 to 4.813	No	ns	0.9997	E	CYLD 15340GD
	4	0	0	0	20	0	0	0	0	16	4	0	0	4	8	0	0	0		vg>Src42A CA vs. CYLD BL35614	0.4	-4.281 to 5.081	No	ns	0.9997	F	CYLD BL35614
	5	0	0	0	20	0	0	0.04	0	4	8	0	4	4	0	0	4	0		vg>Src42A CA vs. raf BL31596	0.352	-4.329 to 5.033	No	ns	0.9997	G	raf BL31596
	6	0	0	0		0			0	4		4	0	0	0	0	0	4		vg>Src42A CA vs. raf BL55679	-1.6	-6.013 to 2.813	No	ns	0.9775	H	raf BL55679
	7	0	0	0						8			0			0		0		vg>Src42A CA vs. bwa BL29409	-5.886	-10.10 to -1.674	Yes	**	0.0012	I	bwa BL29409
	8	0	0	0												0		12		vg>Src42A CA vs. cdase BL36764	-3.6	-8.281 to 1.081	No	ns	0.2508	J	cdase BL36764
	9	0	0	0												0		8		vg>Src42A CA vs. PGRP-LC 106361KK	-0.2667	-4.680 to 4.147	No	ns	0.9998	K	PGRP-LC 106361KK
	10	0	0	0												0				vg>Src42A CA vs. FADD 100333KK	-0.1714	-4.383 to 4.040	No	ns	0.9999	L	FADD 100333KK
	Average	0.4	0	0.4	20.8	0	0	0.048	2	6.28571	4	0.666667	0.571429	1.33333	2	0	2.66667	2.66667		vg>Src42A CA vs. CG15533 BL36761	-0.9333	-5.347 to 3.480	No	ns	0.9991	M	CG15533 BL36761
																				vg>Src42A CA vs. put BL35159	-1.6	-6.013 to 2.813	No	ns	0.9775	N	put BL35159
		10	10	10	5	6	5	5	6	7	5	6	7	6	6	10	6	9		vg>Src42A CA vs. put 848GD	0.4	-3.422 to 4.222	No	ns	0.9996	O	put 848GD
																				vg>Src42A CA vs. calpain D 17740GD	-2.267	-6.680 to 2.147	No	ns	0.7755	P	calpain D 17740GD
																				vg>Src42A CA vs. calpain D BL29463	-2.267	-6.194 to 1.660	No	ns	0.634	Q	calpain D BL29463
																				Test details	Mean 1	Mean 2	Mean Diff.	SE of diff.	n1	n2	q	DF
																				vg>Src42A CA vs. tak1 101357KK	0.4	0	0.4	1.298	10	10	0.3083	102
																				vg>Src42A CA vs. tak1 BL57296	0.4	0.4	0	1.298	10	10	0	102
																				vg>Src42A CA vs. slpr RNAi BL32948	0.4	20.8	-20.4	1.589	10	5	12.84	102
																				vg>Src42A CA vs. CYLD 15340GD	0.4	0	0.4	1.498	10	6	0.267	102
																				vg>Src42A CA vs. CYLD BL35614	0.4	0	0.4	1.589	10	5	0.2517	102
																				vg>Src42A CA vs. raf BL31596	0.4	0.048	0.352	1.589	10	5	0.2215	102
																				vg>Src42A CA vs. raf BL55679	0.4	2	-1.6	1.498	10	6	1.068	102
																				vg>Src42A CA vs. bwa BL29409	0.4	6.286	-5.886	1.43	10	7	4.116	102
																				vg>Src42A CA vs. cdase BL36764	0.4	4	-3.6	1.589	10	5	2.265	102
																				vg>Src42A CA vs. PGRP-LC 106361KK	0.4	0.6667	-0.2667	1.498	10	6	0.178	102
																				vg>Src42A CA vs. FADD 100333KK	0.4	0.5714	-0.1714	1.43	10	7	0.1199	102
																				vg>Src42A CA vs. CG15533 BL36761	0.4	1.333	-0.9333	1.498	10	6	0.6229	102
																				vg>Src42A CA vs. put BL35159	0.4	2	-1.6	1.498	10	6	1.068	102
																				vg>Src42A CA vs. put 848GD	0.4	0	0.4	1.298	10	10	0.3083	102
																				vg>Src42A CA vs. calpain D 17740GD	0.4	2.667	-2.267	1.498	10	6	1.513	102
																				vg>Src42A CA vs. calpain D BL29463	0.4	2.667	-2.267	1.333	10	9	1.7	102
																				Data analyzed
																			Sample number	Control	10
																				tak1 101357KK	10
																				tak1 BL57296	10
																				slpr RNAi BL32948	5
																				CYLD 15340GD	6
																				CYLD BL35614	5
																				raf BL31596	5
																				raf BL55679	6
																				bwa BL29409	7
																				cdase BL36764	5
																				PGRP-LC 106361KK	6
																				FADD 100333KK	7
																				CG15533 BL36761	6
																				put BL35159	6
																				put 848GD	10
																				calpain D 17740GD	6
																				calpain D BL29463	9

## Sheet: Figure 2 S1 C
		Expression of slpr (relative)
	Sample number	act5c>+	act5c>slpr RNAi TRiP
	1	1.27107	0.395515
	2	1.34846	0.542207
	3	0.707289	0.574308
	4	0.673178	0.512057
	Average	1	0.506022

## Sheet: Figure 2 S1 E
		Survival rate (%)			Unpaired t test
	Sample number	gmr>Src42A	gmr>Src42A, slpr RNAi		P value	<0.0001
	1	92	60		P value summary	****
	2	100	84		Significantly different (P < 0.05)?	Yes
	3	94	68		One- or two-tailed P value?	Two-tailed
	4	96	60		t, df	t=9.099, df=11
	5	86	44
	6	84	48		Data analyzed
	7	94	52		Sample size, gmr>Src42A	7
	8				Sample size, gmr>Src42A, slpr RNAi	7
	Average	92.2857	59.4286

## Sheet: Figure 3 C
		Volume of GFP+ cells (um3)					Šídák's multiple comparisons test	Mean Diff.	95.00% CI of diff.	Below threshold?	Summary	Adjusted P Value
	Sample number	vg>+	vg>Src42A CA	vg>Src42A CA, JNK DN	vg>Src42A CA, slpr RNAi		vg>Src42A CA vs. vg>Src42A CA, JNK DN	-4129696	-4628686 to -3630707	Yes	****	<0.0001
	1	694703	1230000	6300000	1947200		vg>Src42A CA, JNK DN vs. vg>Src42A CA, slpr RNAi	3296128	2801594 to 3790662	Yes	****	<0.0001
	2	647661	1480000	6560000	1790000		vg>+ vs. vg>Src42A CA	-339899	-674454 to -5344	Yes	*	0.0453
	3	761644	1280000	4080000	1680000
	4	841150	635401	4240000	2140000		Test details	Mean 1	Mean 2	Mean Diff.	SE of diff.	n1	n2	t	DF
	5	753203	1020000	7680000	3300000		vg>Src42A CA vs. vg>Src42A CA, JNK DN	1109054	5238750	-4129696	204662	17	8	20.18	81
	6	852543	805890	4220000	1850000		vg>Src42A CA, JNK DN vs. vg>Src42A CA, slpr RNAi	5238750	1942622	3296128	202835	8	18	16.25	81
	7	778678	1410000	4030000	2020000		vg>+ vs. vg>Src42A CA	769154	1109054	-339899	137219	42	17	2.477	81
	8	913857	1060000	4800000	1850000
	9	860020	798666		2290000		Data analyzed
	10	764690	687685		1960000		Sample size, vg>+	42
	11	614838	1430000		1910000		Sample size, vg>Src42A CA	17
	12	639110	821091		1500000		Sample size, vg>Src42A CA, JNK DN	8
	13	661934	1160000		1390000		Sample size, vg>Src42A CA, slpr RNAi	18
	14	734553	1590000		2140000
	15	847873	985181		1990000
	16	765274	1330000		1720000
	17	752073	1130000		1990000
	18	830358			1500000
	19	861170
	20	755805
	21	685805
	22	657772
	23	737039
	24	640615
	25	774624
	26	696649
	27	712649
	28	721305
	29	719683
	30	852750
	31	672726
	32	692017
	33	958451
	34	805998
	35	879718
	36	708625
	37	697783
	38	843628
	39	916074
	40	823671
	41	841150
	42	934615
	Average	769154	1.10905e+06	5238750	1.94262e+06

[truncated: 50 more sheets: Figure 3 D, Figure 3 E, Figure 3 S1 B, Figure 3 S1 D, Figure 3 S1 F, Figure 3 S1 H, Figure 3 S1 I, Figure 4 B, Figure 4 D, Figure 4 E, Figure 4 F, Figure 4 S1 B, Figure 4 S1 D, Figure 4 S1 E, Figure 4 S1 G, Figure 4 S1 H, Figure 4 S2 B, Figure 4 S2 C, Figure 4 S2 E, Figure 4 S2 F …]
