# Supplementary material for: Methionine restriction breaks obligatory coupling of cell proliferation and death by an oncogene Src in Drosophila
Source: eLife. 2021 Apr 27;10:e59809. doi: 10.7554/eLife.59809 (PMC8079150; doi:10.7554/eLife.59809)
Supplement: Supplementary file 4. — The table shows sequences of the primers used in this study. [file elife-59809-supp4.xlsx]

## Sheet: Sheet1
			Forward	Reverse
		slpr	5'-CTACAAGGGCTTCGATCCGTTG-3	5'-GTTTGCCAGCAGCTCTTCATCAG-3
			5'-CAATCATCTGCAGCAGAAGACGC-3'	5'-CATCGGAGAATTTGGAATAGGTGC-3'
		sams	5'-GCCAACGGCGTTCATATC-3'	5'-GGCATATCCAAACATGATACCC-3'
	AA transporters	CG13248	5'-AAACCGATGCCTCAACACCTT-3'	5'-CAGTCAGCACGTAGATGCCA-3'
		tadr	5'-CAGCCCGCTGTAAAACTAGC-3'	5'-GGCCAGAGCATCTAGCCAG-3'
		CG9413	5'-TGGGGTGGCTTTAATTGTTGG-3'	5'-CAGTGCGAACCAGTAAACCG-3'
		jhl-21	5'-TCAAGCGGAAGCTAACACTCA-3'	5'-TTCGGTGTAAATAAAGACTCCCG-3'
		sbm	5'-AATGTGCCAACAAAAACAACGA-3'	5'-GTCCCTGATGAGTCGGTCTC-3'
		CG8757	5'-AGAAACGATTGGATCGGGCA-3'	5'-ATCTGCCATCTTTTGGACCGA-3'
		CG16700	5'-CCTACAAGCTATCTGGAGACCA-3'	5'-GAGACCTCCGTTCTTGAAGGC-3'
		path	5'-TGTTTGATTTGCGCGGCATT-3'	5'-TTCGACCCGCTGTCCACTAT-3'
	GATOR1	CG8783 nprl3	5'-GTTAAACCACAGCTATGCAACCA-3'	5'-CAGAGTGGGATGACTGACAAAG-3'
	complex	CG9104 nprl2	5'-TTCAACGCTGCATTCTCACC-3'	5'-ATTCCGTGCGTACTTCTGCTG-3'
	components	CG12090 iml1	5'-CGTGGCTGCAACAAATCCTAC-3'	5'-GCCCGATTCTATGCTTATCACA-3'
	GATOR2 complex components	CG7609 wdr24	5'-GCCCTGGCCCTGAATAAGG-3'	5'-TGAAGCCATTGCTGTTTATGGAG-3'
		CG4705 wdr59	5'-GCACCCGAACAAACGTACATC-3'	5'-CCGAGTAATCAACCGACATGG-3'
		CG8722 nup44A	5'-GAGGAGGTGATTGGCGAAAAG-3'	5'-GCGAGTCTACAAGGGTGGTG-3'
		CG7074 mio	5'-AGCGAGACGAGCTAAACAATTC-3'	5'-GTGTAAGAGGCAAGCAAAGGTT-3'
		RpL32	5'-CCAGCATACAGGCCCAAGATCGTG-3'	5'-TCTTGAATCCGGTGGGCAGCATG-3'
